# Supplementary material for: Synthesis and photochemical properties of BODIPY-functionalized silica nanoparticles for imaging Cu2+ in living cells
Source: Royal Society of Chemistry journal article supplement (doi:10.1039/c4ra03183k), 2014-01-01

## Supporting information

### **Synthesis and photochemical properties of BODIPY-functionalized silica nanoparticle for imaging Cu<sup>2+</sup> in living cells**

Xiaoting Yu, Xu Jia, Xiaolong Yang, Weisheng Liu, Wenwu Qin<sup>1</sup>

*Key Laboratory of Nonferrous Metal Chemistry and Resources Utilization of Gansu Province and State Key Laboratory of Applied Organic Chemistry, College of Chemistry and Chemical Engineering, Lanzhou University, Lanzhou 730000, P. R. China.*

---

<sup>1</sup> To whom correspondence should be addressed. E-mail for W. Qin: [qinww@lzu.edu.cn](mailto:qinww@lzu.edu.cn), Tel.: +86-931-8912582; Fax: +86-931-8912582

## Table of Contents

|                                                                                |           |
|--------------------------------------------------------------------------------|-----------|
| <b>Table S1 Fluorescence lifetime.....</b>                                     | <b>3</b>  |
| <b>Figure S1 Infrared spectrum.....</b>                                        | <b>4</b>  |
| <b>Figure S2 Absorption spectrum of SN.....</b>                                | <b>4</b>  |
| <b>Figure S3 Water dependent absorption spectra.....</b>                       | <b>5</b>  |
| <b>Figure S4 Linear fit of fluorescence intensity and water content.....</b>   | <b>6</b>  |
| <b>Figure S5 Water dependent fluorescence spectra.....</b>                     | <b>6</b>  |
| <b>Figure S6 Absorption spectra as a function of [Cu<sup>2+</sup>] .....</b>   | <b>7</b>  |
| <b>Figure S7 Fluorescence selectivity for Cu<sup>2+</sup> .....</b>            | <b>7</b>  |
| <b>Figure S8 Fit of fluorometric titration data of [Cu<sup>2+</sup>] .....</b> | <b>8</b>  |
| <b>Figure S9 Fluorescence spectra with different copper sources.....</b>       | <b>9</b>  |
| <b>Figure S10 Fluorescence reversibility.....</b>                              | <b>10</b> |
| <b>Figure S11 Fluorescence decay curves .....</b>                              | <b>11</b> |
| <b><sup>1</sup>H NMR of BODIPY .....</b>                                       | <b>12</b> |
| <b><sup>13</sup>C NMR of BODIPY .....</b>                                      | <b>13</b> |
| <b><sup>1</sup>H NMR of BODIPY-DPA .....</b>                                   | <b>14</b> |
| <b><sup>13</sup>C NMR of BODIPY-DPA .....</b>                                  | <b>15</b> |
| <b>MS Spectrum of BODIPY-DPA .....</b>                                         | <b>16</b> |

Table S1 The lifetime of **1** and **1**-Cu complex in organic-water (V/V, 1:1) solvents

| Solvent                                      | Monitored<br>wavelength<br>h/ nm | $\tau_1$ /ns       | $\tau_2$ /ns       |
|----------------------------------------------|----------------------------------|--------------------|--------------------|
| <b>1</b> in ethanol/H <sub>2</sub> O         | 580                              | 1.03±0.00 (96.70%) | 4.04±0.17 (3.30%)  |
|                                              | 590                              | 1.07±0.00 (97.71%) | 4.95±0.29 (2.29%)  |
|                                              | 600                              | 1.05±0.00 (97.39%) | 4.37±0.23 (2.61%)  |
| <b>1</b> in acetonitrile/H <sub>2</sub> O    | 580                              | 0.50±0.00 (87.43%) | 3.44±0.03 (12.57%) |
|                                              | 590                              | 0.51±0.00 (90.18%) | 3.40±0.03 (9.82%)  |
|                                              | 600                              | 0.49±0.00 (90.29%) | 3.35±0.04 (9.71%)  |
| <b>1</b> in tetrahydrofuran/H <sub>2</sub> O | 580                              | 0.81±0.00 (88.62%) | 3.15±0.05 (11.38%) |
|                                              | 590                              | 0.82±0.00 (91.76%) | 3.25±0.06 (8.24%)  |
|                                              | 600                              | 0.83±0.00 (92.69%) | 3.56±0.07 (7.31%)  |
| <b>1</b> -Cu in ethanol/H <sub>2</sub> O     | 580                              | 1.06±0.01 (70.42%) | 3.54±0.03 (29.58%) |
|                                              | 590                              | 1.10±0.01 (74.80%) | 3.69±0.03 (25.20%) |
|                                              | 600                              | 1.08±0.01 (75.58%) | 3.58±0.04 (24.42%) |

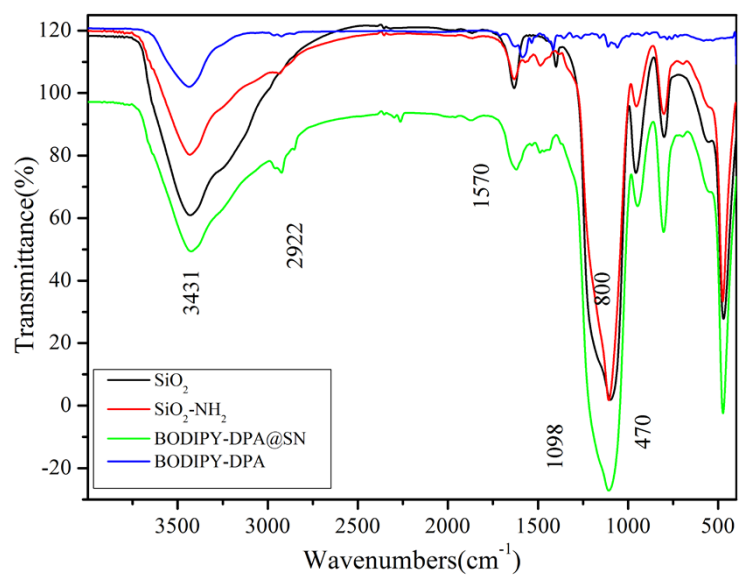

Figure S1 Infrared spectrum of SN, SN-NH<sub>2</sub>, BODIPY-DPA and BODIPY-DPA@SN.

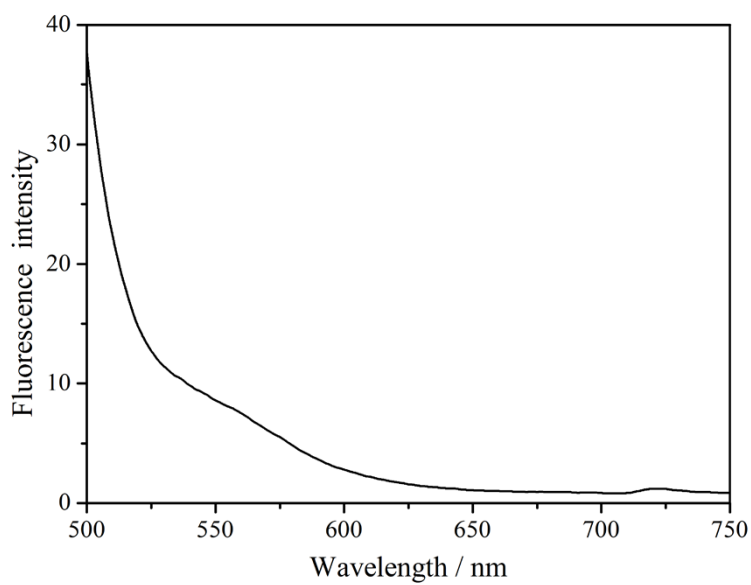

Figure S2 Absorption of silica nanoparticles (SN) in ethanol /water (V/V, 1:1) solvent.

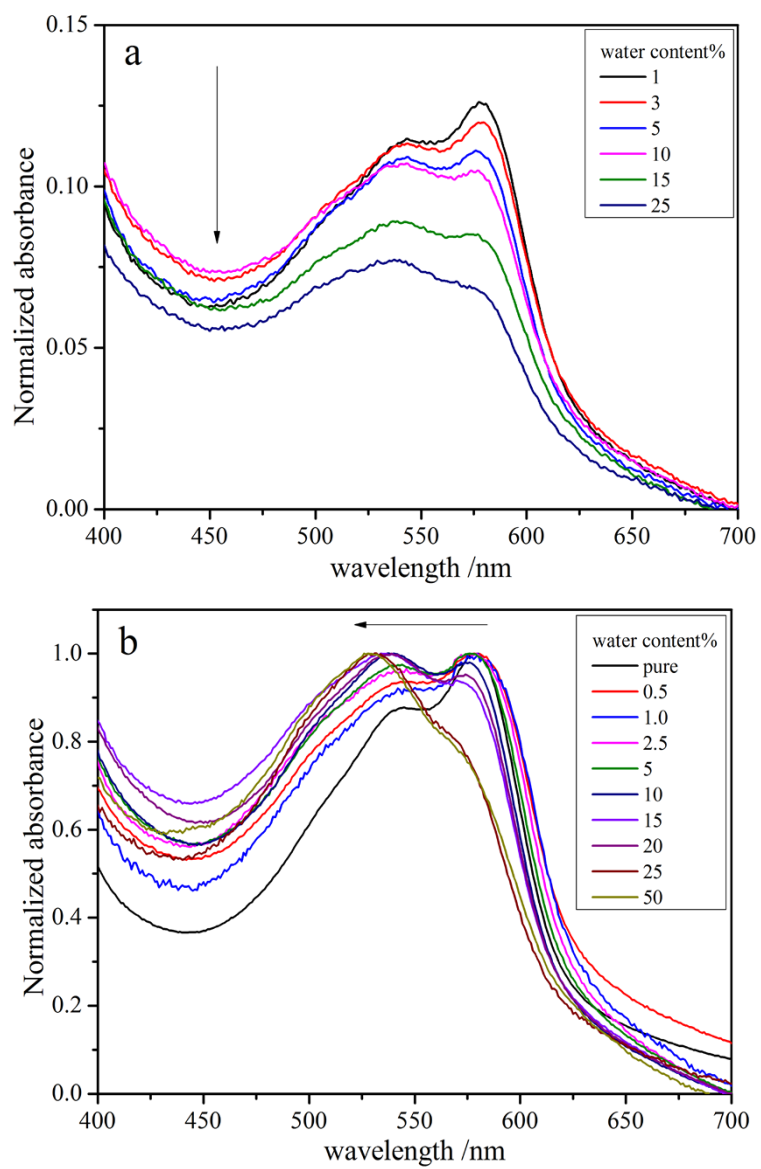

Figure S3 (a) Absorption and (b) normalized absorption spectra of **1** in ethanol solution as a function of water content.

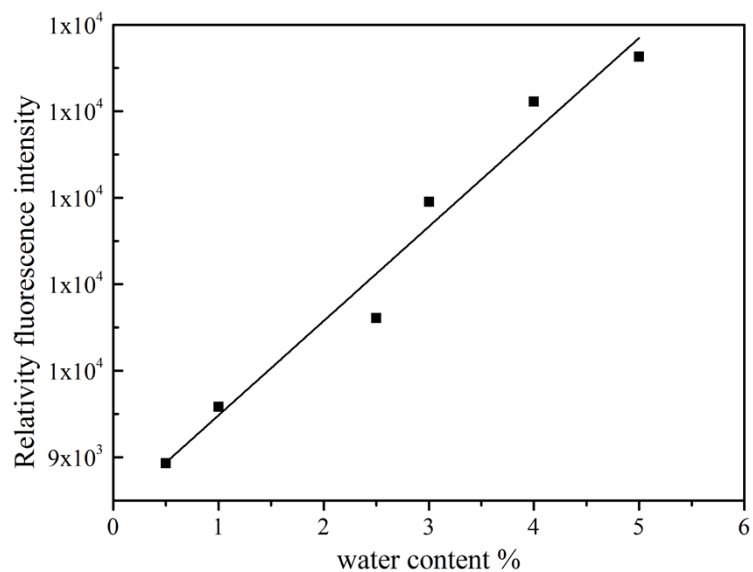

Figure S4 The linear relationship of the fluorescence intensity and the water content within the range 0–5% (v/v) in ethanol solution. The excitation wavelength is 590 nm and the data was obtained from part of the spectra of Fig. 4,  $R^2 = 0.96401$ .

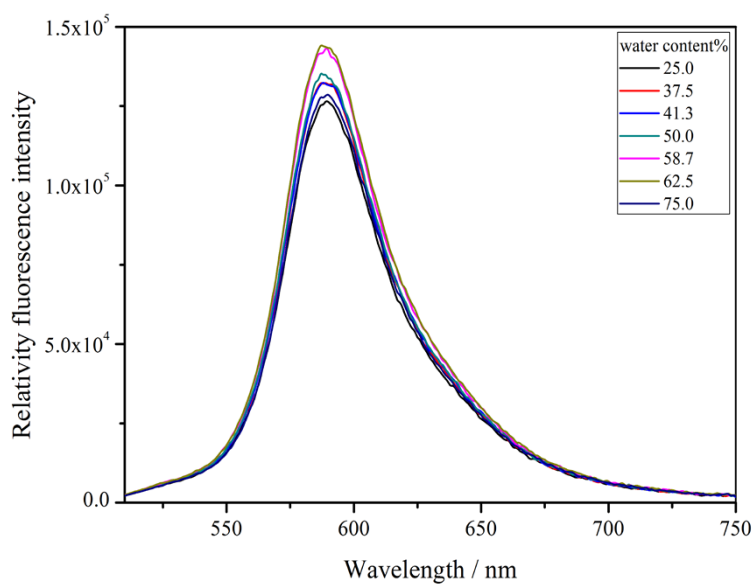

Figure S5 Fluorescence spectra of **1** with different water content (25-75%) in ethanol /water solutions. The excitation wavelength  $\lambda_{\text{ex}} = 480$  nm.

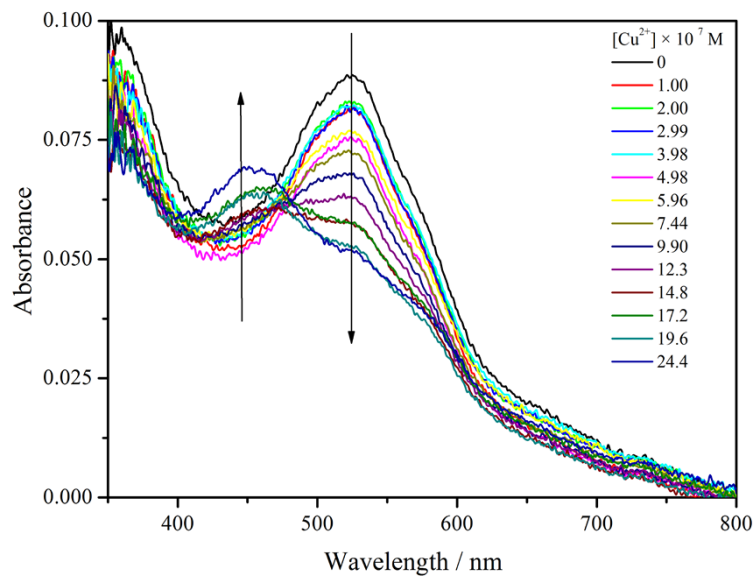

Figure S6 Absorption spectra of **1** (50 mg/L) in ethanol/water (1/1, V/V) solution as a function of  $[\text{Cu}^{2+}]$ .

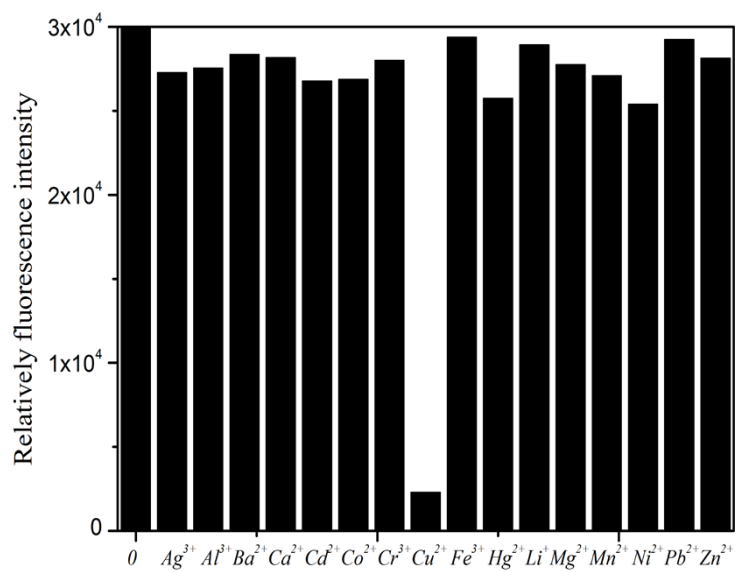

Figure S7 Fluorescence intensity of **1** (50 mg/L) with several metal ions (2  $\mu\text{M}$ ) in ethanol/water (1/1, V/V) solution.

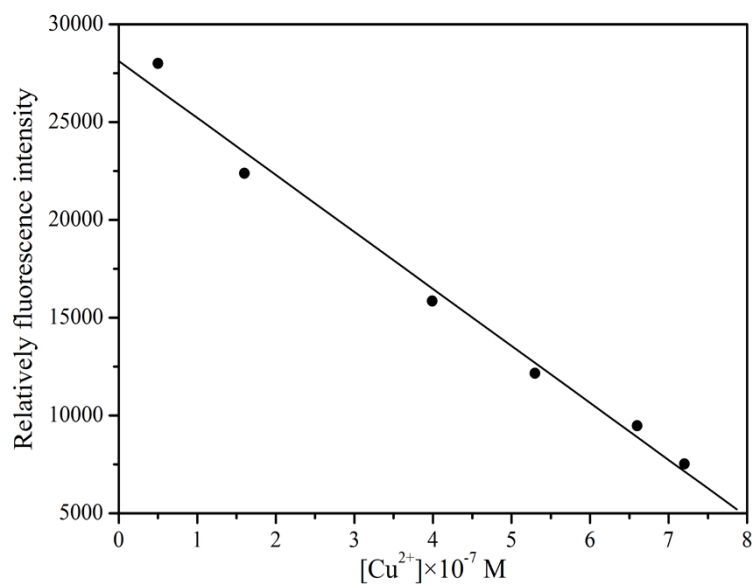

Figure S8 The linear relationship of fluorescence intensity and the concentration of  $\text{Cu}^{2+}$  (0.05–0.72  $\mu\text{M}$ ). In ethanol/water (1/1, V/V) solution, and  $\lambda_{\text{ex}} = 590 \text{ nm}$ .



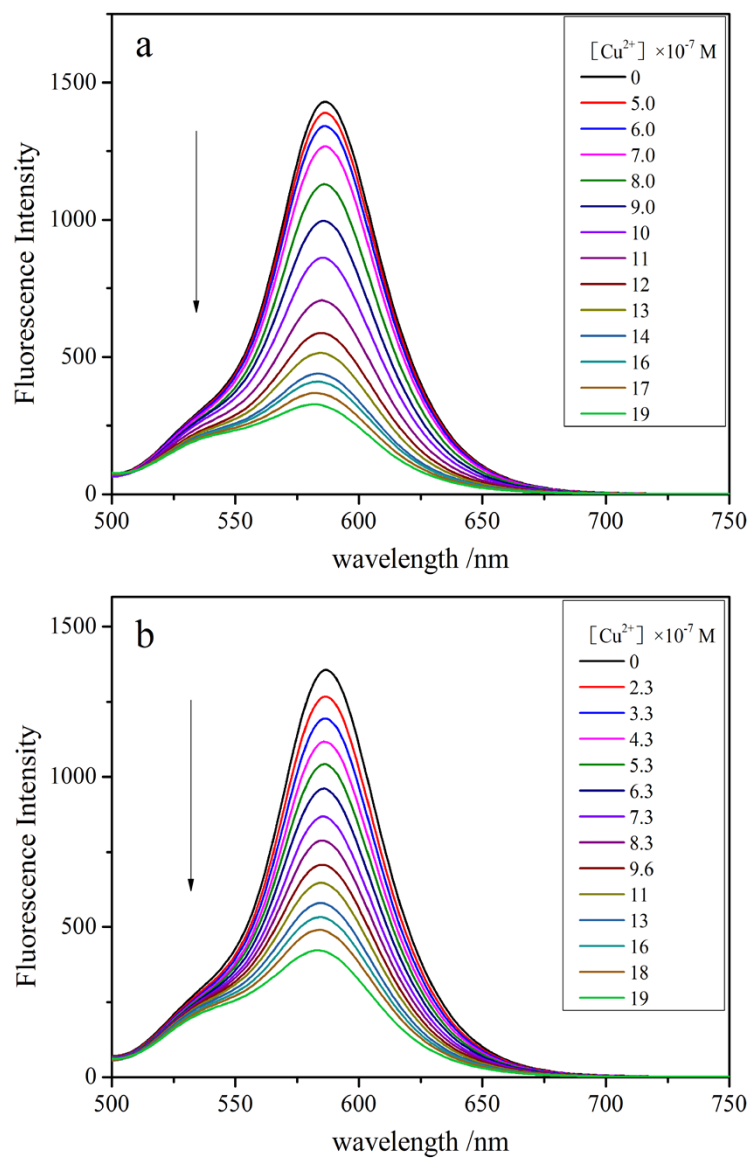

Figure S9 Fluorescence spectra of **1** as a function of (a)  $\text{CuCl}_2$  and (b)  $\text{Cu}(\text{NO}_3)_2$  concentration in ethanol/water (1/1, V/V) solution.

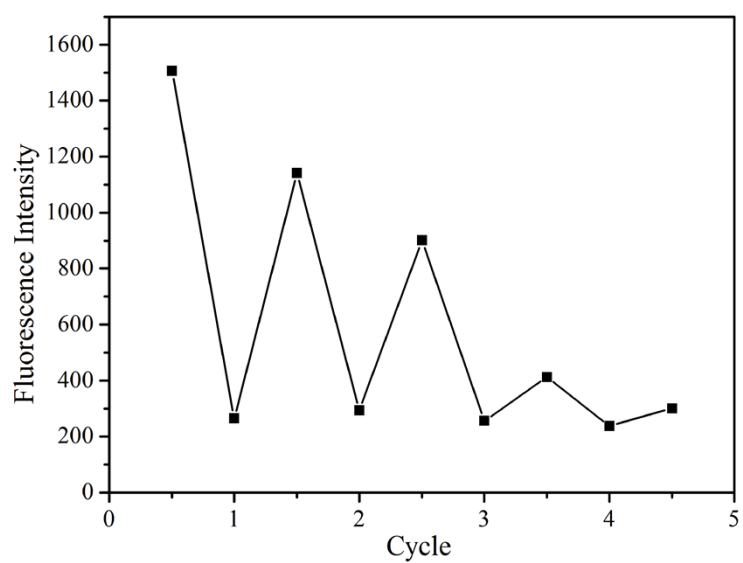

Figure S10 Fluorescence spectra of **1** with the addition of  $\text{Cu}^{2+}$  and  $\text{Na}_2\text{S}$  in ethanol/water (1/1, V/V) solution.

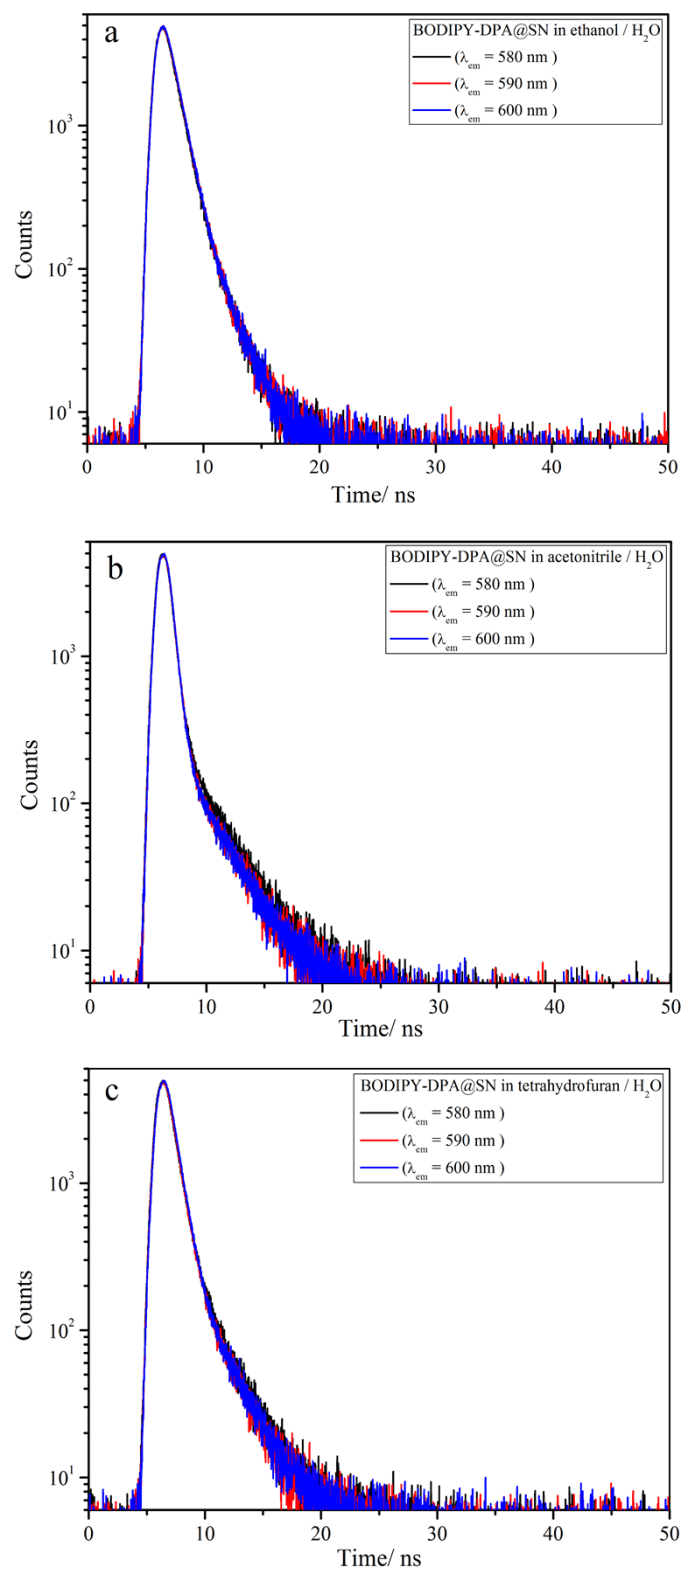

Figure S11 Fluorescence decay curves of **1** in (a) ethanol/water (1/1, V/V), (b) acetonitrile/water (1/1, V/V) and (c) tetrahydrofuran/water (1/1, V/V) ( $\lambda_{em}$ = 580 -600 nm) solutions excited at 480 nm.

**<sup>1</sup>H NMR (CDCl<sub>3</sub>, 400 MHz) spectrum of 3,5-Dichloro-8-(4-tolyl)-4,4-difluoro-4-bora-3a,4a-diaza-s-indacene**

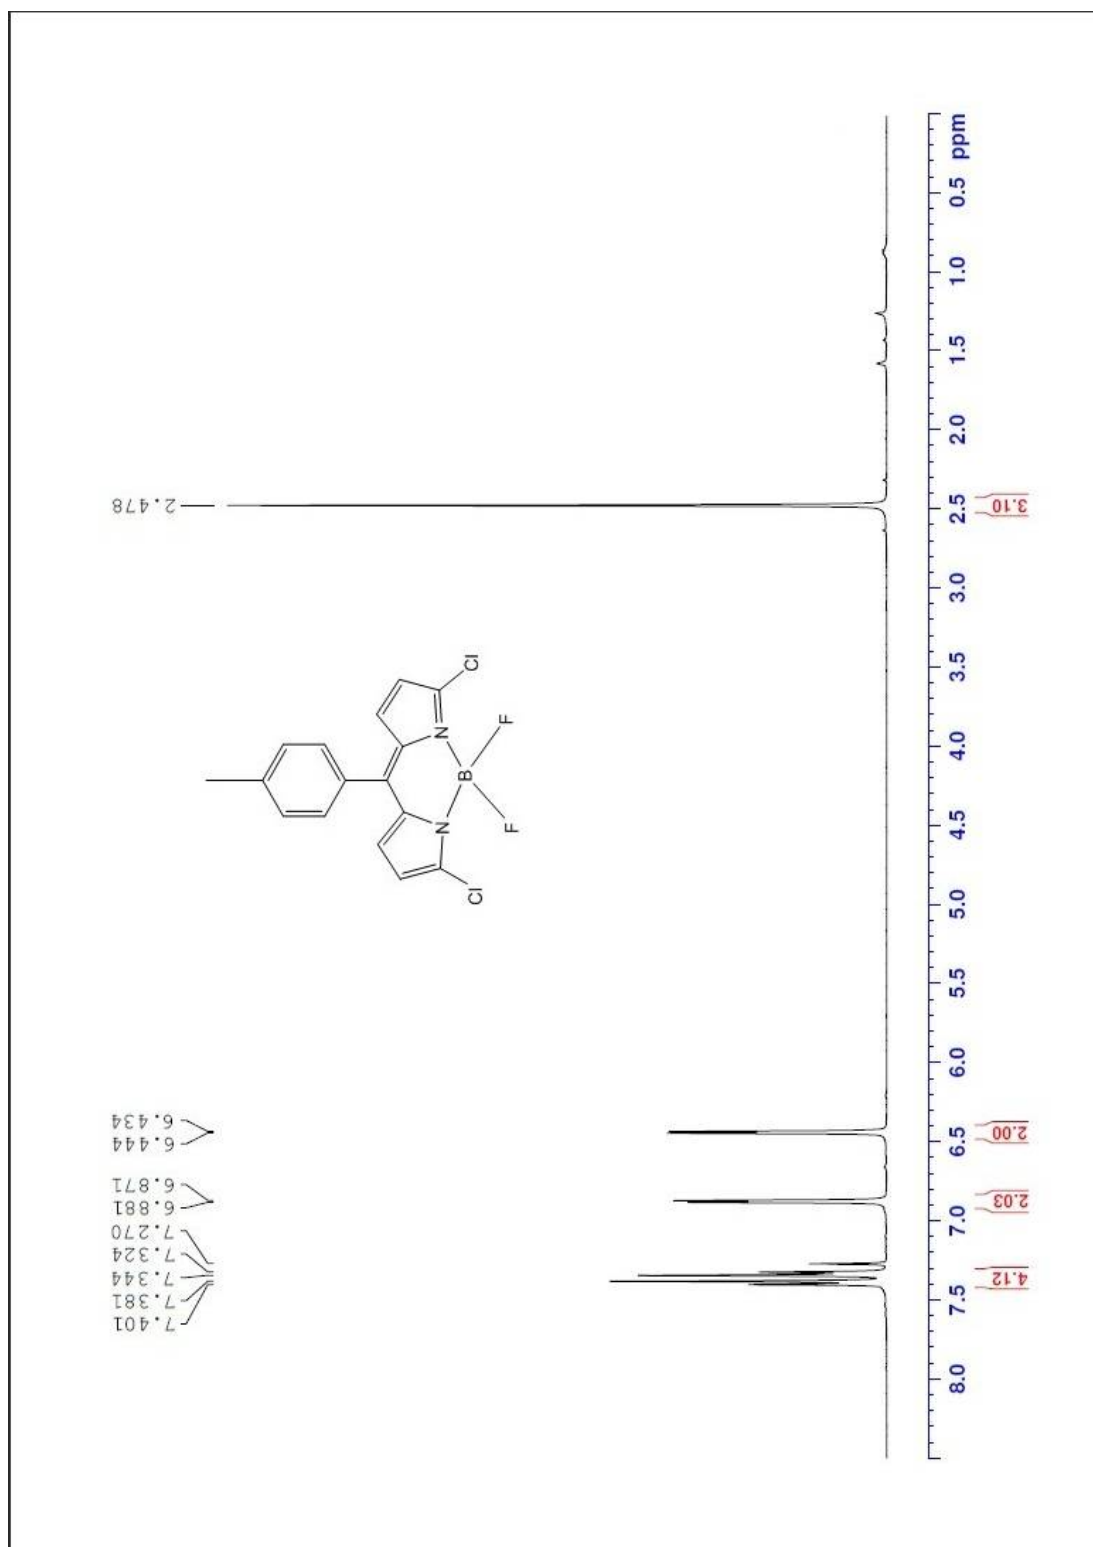

**<sup>13</sup>C NMR (CDCl<sub>3</sub>, 100 MHz) spectrum of 3,5-Dichloro-8-(4-tolyl)-4,4-difluoro-4-bora-3a,4a-diaza-s-indacene**

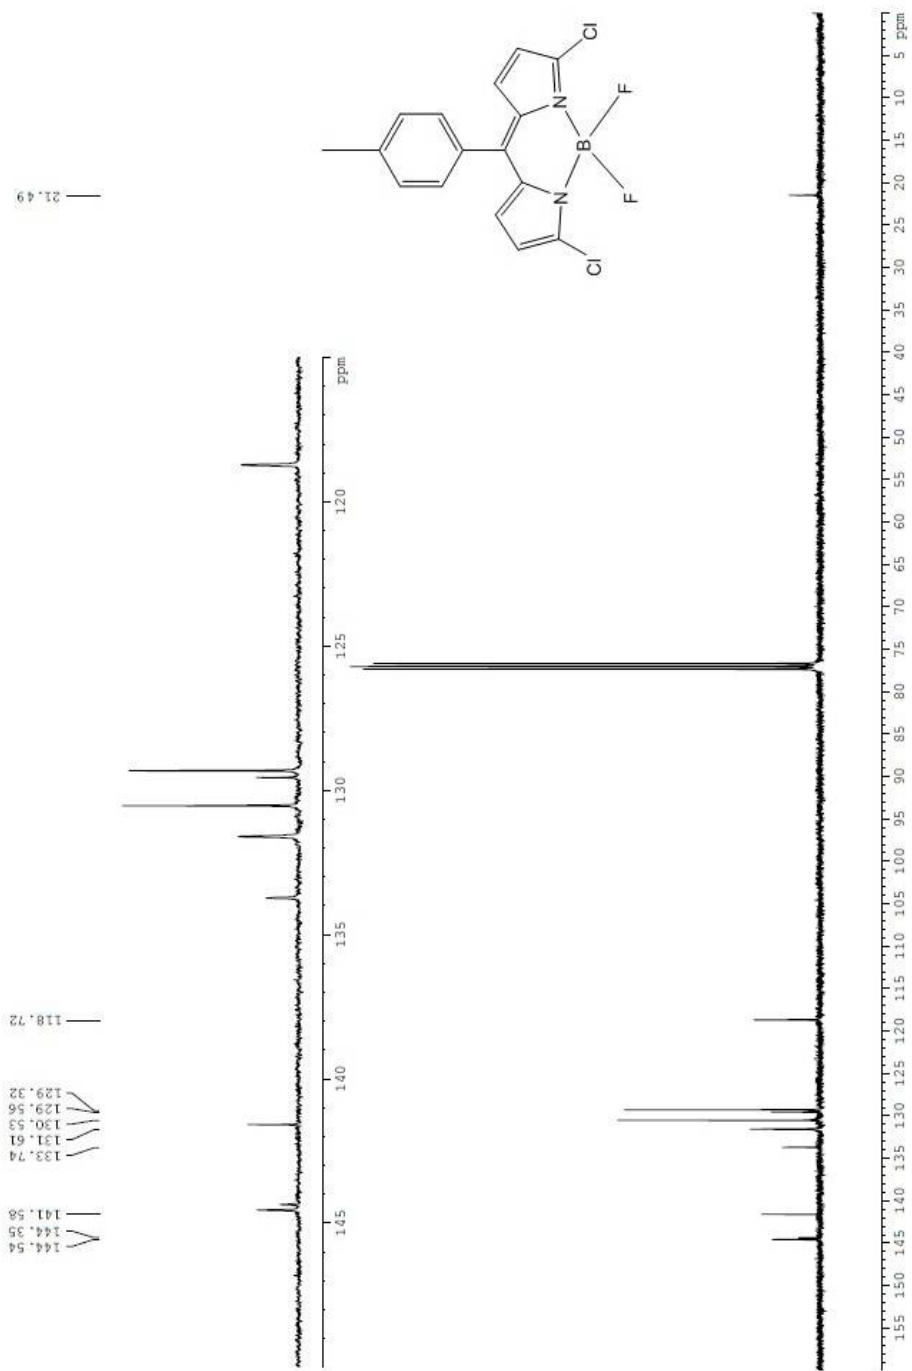

# $^1\text{H}$ NMR ( $\text{CDCl}_3$ , 400 MHz) spectrum of BODIPY-DPA

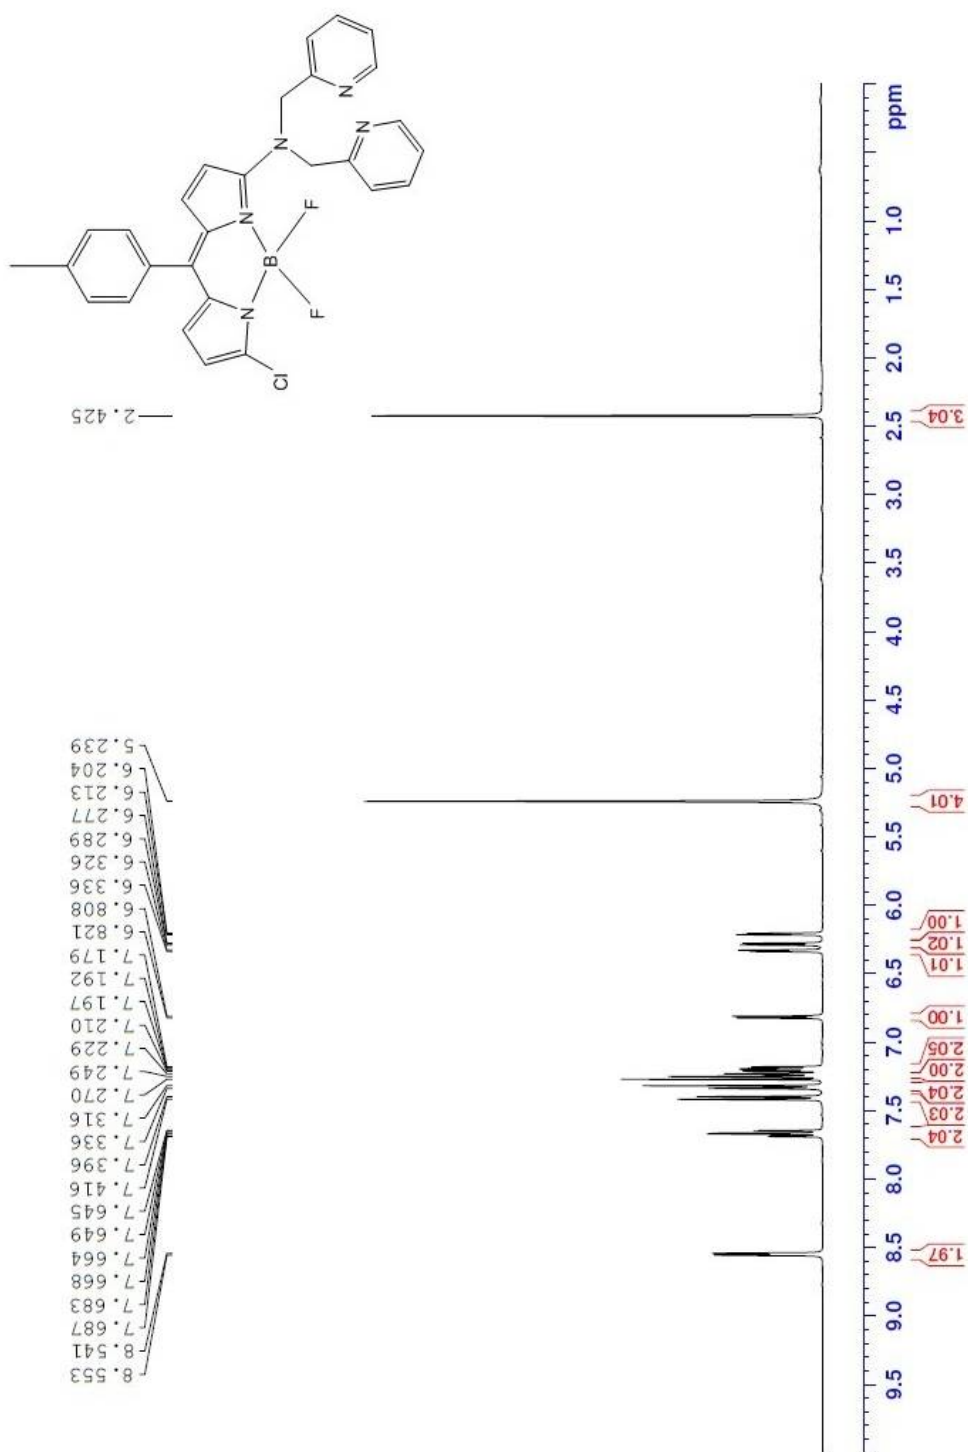

# <sup>13</sup>C NMR (CDCl<sub>3</sub>, 100 MHz) spectrum of BODIPY-DPA

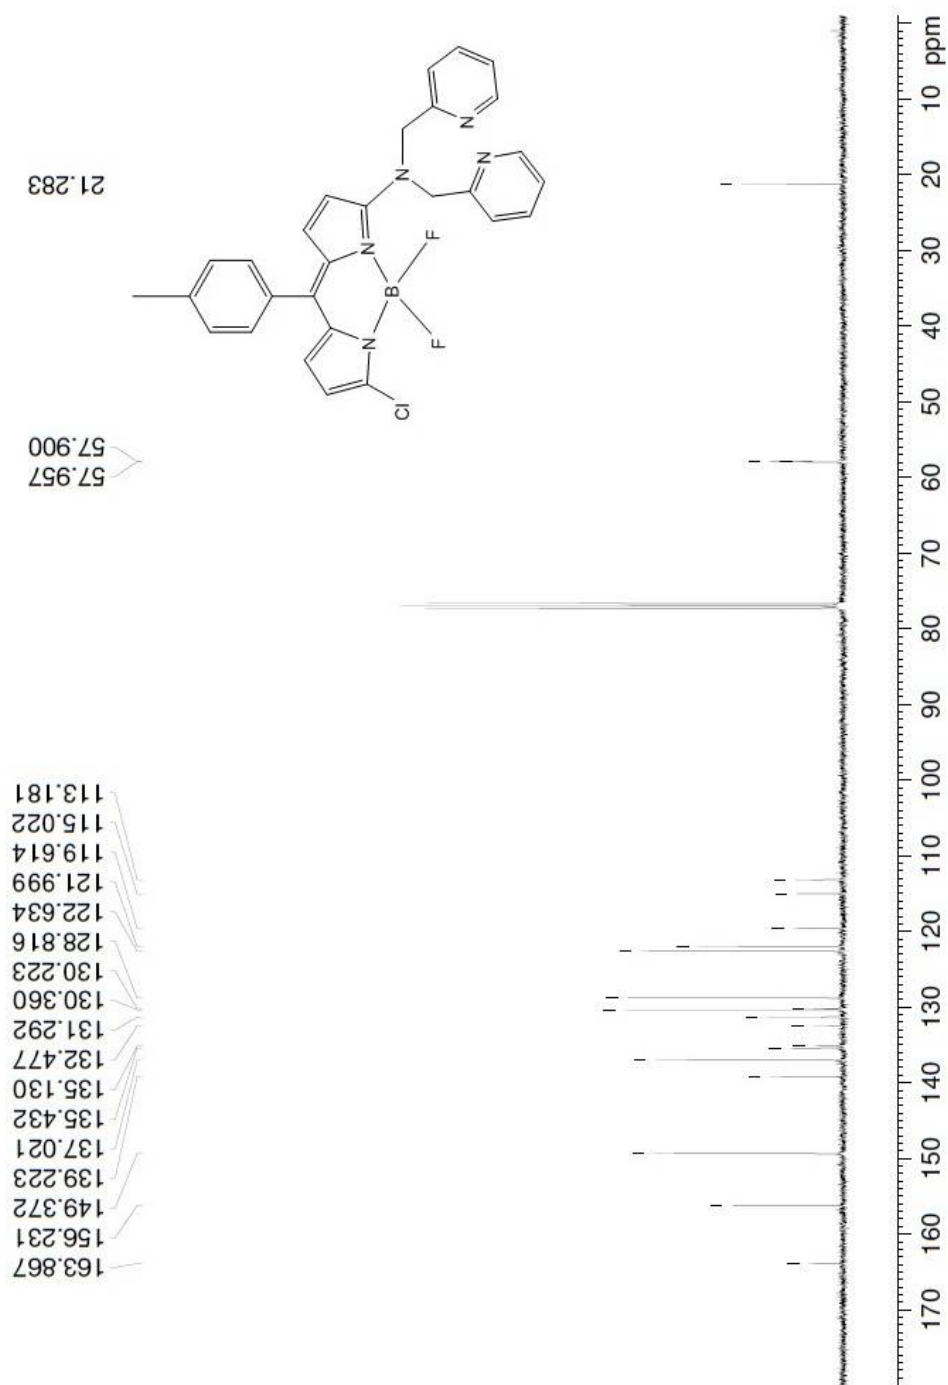

# MS Spectrum of BODIPY-DPA (1+ H<sup>+</sup>)

## Generic Display Report

### Analysis Info

Analysis Name D:\Data\YANGY\_MS\New\JIAXU120320.d  
Method LOWmass.m  
Sample Name M=513  
Comment

Acquisition Date 3/20/2012 10:26:45

Operator ESQ6K  
Instrument esquire6000

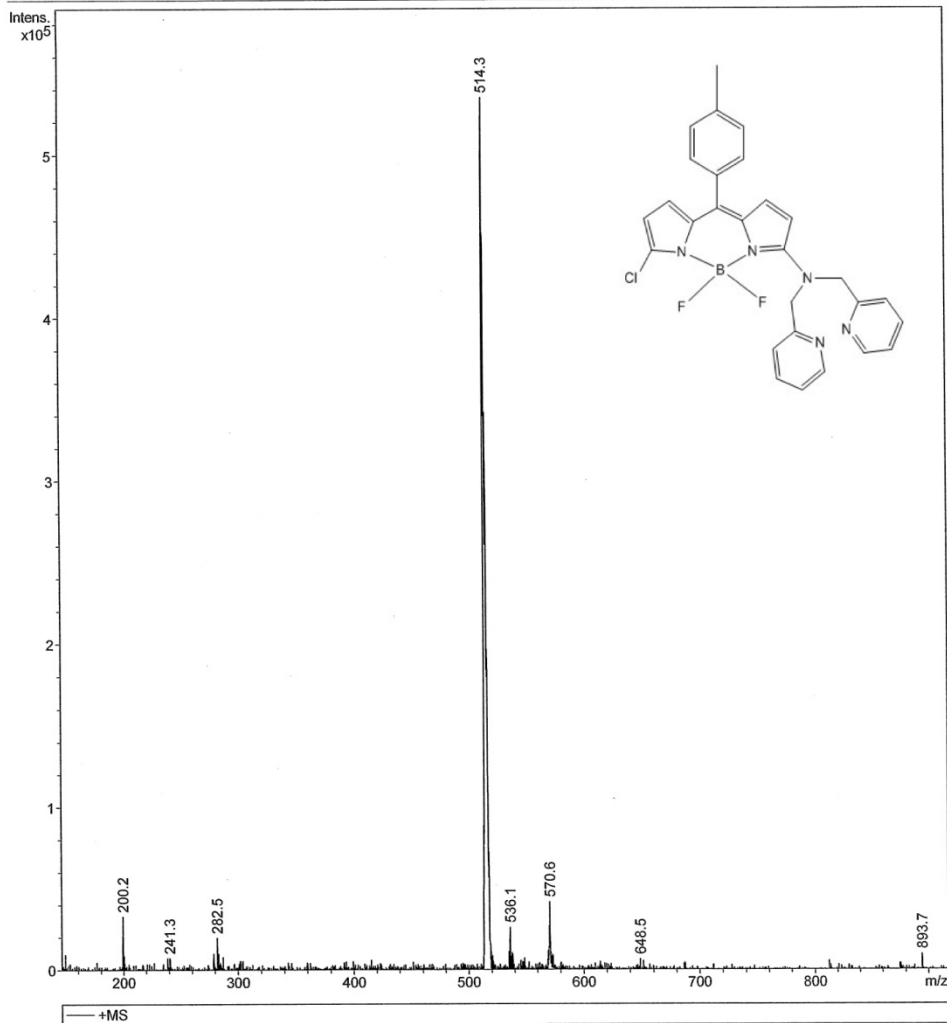

Supplement: c4ra03183k1.pdf [file c4ra03183k1.pdf]
